# Supplementary material for: Advanced Radio Frequency Applicators for Thermal Magnetic Resonance Theranostics of Brain Tumors
Source: MDPI journal article supplement (doi:10.3390/cancers15082303), 2023-04-14
Supplement: s1 [file s1]

**Table S1:** The dielectric and thermal properties of the tumor and healthy tissues used for the human voxel model Duke

| Tissue               | Relative permittivity | Electrical conductivity | Mass density         | Thermal conductivity | Specific heat | Diffusivity         | Blood perfusion coefficient | Metabolic rate      |
|----------------------|-----------------------|-------------------------|----------------------|----------------------|---------------|---------------------|-----------------------------|---------------------|
|                      |                       | [S/m]                   | [kg/m <sup>3</sup> ] | [W/k/m]              | [J/k/kg]      | [m <sup>2</sup> /s] | [W/K/m <sup>3</sup> ]       | [W/m <sup>3</sup> ] |
| Air_internal         | 1                     |                         |                      | 0.02                 | 100           |                     |                             |                     |
| Artery               | 64.8198               | 1.33296                 | 1060                 | 0.51                 | 3824          | 1.26E-07            | 1.00E+06                    |                     |
| Blood Vessel Wall    | 64.8198               | 1.33296                 | 1060                 | 0.51                 | 3824          | 1.26E-07            | 1.00E+06                    |                     |
| Bone (Cortical)      | 13.2772               | 0.0869573               | 1908                 | 0.4                  | 1289          | 1.56E-07            | 3400                        | 610                 |
| Brain (Grey Matter)  | 58.5531               | 0.7156                  | 1045                 | 0.502                | 3700          | 1.32E-07            | 40000                       | 7100                |
| Brain (White Matter) | 42.8108               | 0.429387                | 1041                 | 0.502                | 3600          | 1.35E-07            | 17280                       | 7100                |
| Cartilage            | 46.0431               | 0.56943                 | 1100                 | 0.624                | 3500          | 1.73E-07            | 9000                        | 1600                |
| Cerebellum           | 57.5983               | 1.00296                 | 1045                 | 0.502                | 3700          | 1.32E-07            | 40000                       | 7100                |
| Cerebrospinal Fluid  | 71.7086               | 2.23818                 | 1007                 | 0.6                  | 4187          | 1.43E-07            |                             |                     |
| Commissura Anterior  | 42.8108               | 0.429387                | 1041                 | 0.502                | 3600          | 1.35E-07            | 17280                       | 7100                |
| Commissura Posterior | 42.8108               | 0.429387                | 1041                 | 0.502                | 3600          | 1.35E-07            | 17280                       | 7100                |
| Connective Tissue    | 47.5897               | 0.54809                 | 1027                 | 0.201                | 2500          | 8.84E-07            | 1700                        | 300                 |
| ear_cartilage        | 46.0431               | 0.56943                 | 1030                 | 0.624                | 3500          | 1.73E-07            | 9000                        | 1600                |
| ear_skin             | 48.0975               | 0.665799                | 1100                 | 0.293                | 3500          | 7.61E-08            | 9100                        | 1620                |
| Esophagus            | 68.0198               | 0.987485                | 1040                 | 0.53                 | 3500          | 1.46E-07            | 9000                        | 1600                |
| Eye (Cornea)         | 60.1932               | 1.17225                 | 1076                 | 0.52                 | 3793          | 1.27E-07            | 2585                        |                     |
| Eye (Lens)           | 37.8697               | 0.362949                | 1090                 | 0.4                  | 3664          | 1.00E-07            |                             |                     |
| Eye (Sclera)         | 58.2086               | 0.989943                | 1032                 | 0.4                  | 3000          | 1.29E-07            | 1961                        |                     |
| Eye (Vitreous Humor) | 69.0084               | 1.52309                 | 1009                 | 0.624                | 3932          | 1.57E-07            |                             |                     |
| Fat                  | 11.6766               | 0.0785219               | 911                  | 0.201                | 2500          | 8.84E-08            | 1700                        | 300                 |
| Hippocampus          | 58.5531               | 0.7156                  | 1045                 | 0.502                | 3700          | 1.32E-07            | 40000                       | 7100                |
| Hypophysis           | 61.943                | 0.864093                | 1066                 | 0.624                | 3761          | 1.58E-07            | 360000                      | 64000               |
| Hypothalamus         | 58.5531               | 0.7156                  | 1050                 | 0.624                | 3761          | 1.58E-07            | 360000                      | 64000               |
| Intervertebral Disc  | 46.7393               | 0.926542                | 1100                 | 0.624                | 3500          | 1.73E-07            | 9000                        | 1600                |
| Larynx               | 46.0431               | 0.56943                 | 1100                 | 0.624                | 3500          | 1.73E-07            | 9000                        | 1600                |

|                   |         |           |        |       |      |          |          |       |
|-------------------|---------|-----------|--------|-------|------|----------|----------|-------|
| Mandible          | 13.2772 | 0.0869573 | 1990   | 0.4   | 1289 | 1.56E-07 | 3400     | 610   |
| Medulla Oblongata | 57.5983 | 1.00296   | 1046   | 1.13  | 3675 | 2.99E-07 | 40000    | 7100  |
| Bone Marrow (Red) | 11.9831 | 0.178457  | 1028   | 0.22  | 2700 | 7.93E-08 | 32000    | 5700  |
| Midbrain          | 57.5983 | 1.00296   | 1046   | 1.13  | 3675 | 2.99E-07 | 40000    | 7100  |
| Mucous Membrane   | 57.5958 | 0.783464  | 1050   | 0.34  | 3150 | 1.03E-07 | 9000     | 1600  |
| Muscle            | 57.5958 | 0.783464  | 1041   | 0.53  | 3546 | 1.44E-07 | 2700     | 480   |
| Nerve             | 36.0647 | 0.43294   | 1038   | 0.46  | 3664 | 1.21E-07 | 40000    | 7100  |
| Pharynx           | 1       |           | 1      | 0.02  | 1000 |          |          |       |
| Pineal Body       | 61.943  | 0.864093  | 1053   | 0.624 | 3761 | 1.58E-07 | 360000   | 64000 |
| Pons              | 57.5983 | 1.00296   | 1046   | 1.13  | 3675 | 2.99E-07 | 40000    | 7100  |
| SAT               | 11.6766 | 0.0785219 | 910    | 0.201 | 2500 | 8.84E-08 | 1700     | 300   |
| Skin              | 48.0975 | 0.665799  | 1109   | 0.293 | 3500 | 7.61E-08 | 9100     | 1620  |
| Skull Cortical    | 13.2772 | 0.0869573 | 1990   | 0.4   | 1289 | 1.56E-07 | 3400     | 610   |
| Spinal Cord       | 36.0647 | 0.43294   | 1075   | 0.46  | 3664 | 1.21E-07 | 40000    | 7100  |
| Tendon\Ligament   | 47.5897 | 0.54809   | 1142   | 0.5   | 3500 | 1.29E-07 | 3750     | 480   |
| Tooth             | 13.2772 | 0.0869573 | 2180   | 0.4   | 1289 | 1.56E-07 | 3400     | 610   |
| Thalamus          | 58.5531 | 0.7156    | 1045   | 0.502 | 3700 | 1.32E-07 | 40000    | 7100  |
| Tongue            | 58.2068 | 0.759415  | 1090   | 0.53  | 3546 | 1.44E-07 | 2700     | 480   |
| Trachea           | 44.6848 | 0.6237    | 1080   | 0.47  | 3664 | 1.17E-07 | 9000     | 1600  |
| Trachea Lumen     | 1       |           | 1      | 0.02  | 1000 |          |          |       |
| vein              | 64.8198 | 1.33296   | 1060   | 0.51  | 3824 | 1.26E-07 | 1.00E+06 |       |
| Vertebrae         | 13.2772 | 0.0869573 | 1990   | 0.4   | 1289 | 1.56E-07 | 3400     | 610   |
| Tumor             | 66.5    | 1.15      | 1025.5 | 0.5   | 3600 | 1.35E-07 | 12096    | 3000  |
